# Supplementary material for: Legume-Based Rotations Reduce Cereal Yield Loss and Water Use to Enhance System Yield Resilience in Response to Climate Change
Source: MDPI journal article supplement (doi:10.3390/agriculture16030335), 2026-01-29
Supplement: s1 [file agriculture-4114532-supplementary.pdf › agriculture-4114532-supplementary.pdf]

## Supplementary Materials

**Table S1.** Crop agronomic information.

| Crops                                                | Soybean                       | Peanut                      | Winter wheat                                        | Summer maize |
|------------------------------------------------------|-------------------------------|-----------------------------|-----------------------------------------------------|--------------|
| Variety                                              | Jidou12                       | Jihua 4                     | Kenong 2009                                         | Jundan 20    |
| Total irrigation (mm)                                | 225                           | 225                         | 225                                                 | 75           |
| Irrigation time                                      | Branching, flowering, podding | Seeding, flowering, podding | Pre-wintering/ regreening stage, jointing, anthesis | Sowing       |
| Total N (kg ha <sup>-1</sup> )                       | 151.8                         | 156.3                       | 310.2                                               | 283.7        |
| Base N (kg ha <sup>-1</sup> )                        | 151.8                         | 75                          | 118.5                                               | 0            |
| Topdressing N (kg ha <sup>-1</sup> )                 | 0                             | 81.3                        | 191.7                                               | 283.7        |
| P <sub>2</sub> O <sub>5</sub> (kg ha <sup>-1</sup> ) | 172.5                         | 191.7                       | 299                                                 | 0            |
| K <sub>2</sub> O (kg ha <sup>-1</sup> )              | 150                           | 83.3                        | 0                                                   | 0            |
| Sowing date                                          | Beginning of May              | 1–8 May                     | 5–28 Oct                                            | 14–30 Jun    |
| Harvest date                                         | 25 Sep                        | 12 Sep                      | 10–13 Jun                                           | 01–10 Oct    |

Note: the irrigation and fertilizer were adopted the optimized practices adopted from the local farmers' operations and our previously published optimized measurements [13,34].

**Table S2.** Observed crop indicator values for soybean and peanut during the calibration (2023) and validation (2021) periods.

|                              | Soybean |        |        |        | Peanut |        |        |        |        |
|------------------------------|---------|--------|--------|--------|--------|--------|--------|--------|--------|
|                              | 2 Jun   | 11 Jul | 11 Aug | 25 Sep | 2 Jun  | 23 Jun | 11 Jul | 11 Aug | 12 Sep |
| <i>Calibration (2023)</i>    |         |        |        |        |        |        |        |        |        |
| LAI                          | 0.42    | –      | 3.65   | –      | 0.29   | 1.00   | –      | 2.75   | 3.86   |
| AGB (kg·ha <sup>-1</sup> )   | 354     | 4399   | 6913   | 7555   | 326    | 1144   | 2335   | 4734   | 10959  |
| Yield (kg·ha <sup>-1</sup> ) |         |        |        | 3130   |        |        |        |        | 5139   |
| <i>Validation (2021)</i>     |         |        |        |        |        |        |        |        |        |
| AGB (kg·ha <sup>-1</sup> )   |         |        |        | 9634   |        |        |        |        | 10537  |
| Yield (kg·ha <sup>-1</sup> ) |         |        |        | 3945   |        |        |        |        | 4800   |

**Table S3.** Soil hydraulic functions parameters in model calibration.

| Soil layers (cm) | ORES   | OSAT | ALFA   | NPAR   | KSATFIT | LEXP | H_ENPR | BDENS  |
|------------------|--------|------|--------|--------|---------|------|--------|--------|
| 0-20             | 0.1800 | 0.32 | 0.0130 | 1.3000 | 90.00   | 0.5  | 0.0000 | 1367.2 |
| 20-40            | 0.1800 | 0.45 | 0.0132 | 1.3620 | 43.00   | 0.5  | 0.0000 | 1450.1 |
| 40-60            | 0.1400 | 0.30 | 0.0245 | 1.3000 | 73.00   | 0.5  | 0.0000 | 1433.9 |
| 60-80            | 0.0965 | 0.48 | 0.0196 | 1.3000 | 71.00   | 0.5  | 0.0000 | 1398.4 |
| 80-100           | 0.0357 | 0.30 | 0.0090 | 1.3200 | 2.00    | 0.5  | 0.0000 | 1398.4 |
| 100-120          | 0.0615 | 0.40 | 0.0100 | 1.3200 | 2.00    | 0.5  | 0.0000 | 1484.0 |
| 120-140          | 0.0363 | 0.31 | 0.0090 | 1.2000 | 0.30    | 0.5  | 0.0000 | 1508.2 |
| 140-160          | 0.0372 | 0.43 | 0.0090 | 1.2000 | 1.60    | 0.5  | 0.0000 | 1587.0 |
| 160-180          | 0.0429 | 0.35 | 0.0090 | 1.2500 | 1.60    | 0.5  | 0.0000 | 1587.0 |
| 180-200          | 0.0451 | 0.43 | 0.0090 | 1.200  | 1.60    | 0.5  | 0.0000 | 1587.0 |

Note: ORES is soil residual water content (cm<sup>3</sup>·cm<sup>-3</sup>), OSAT is saturated water content (cm<sup>3</sup>·cm<sup>-3</sup>), ALFA is parameter alfa of the main drying curve (cm), NPAR is parameter n, KSATFIT is the fitting parameter Ksat of hydraulic conductivity function (cm·d<sup>-1</sup>), LEXP is the exponent in the hydraulic

conductivity function, ALFAW is the alfa parameter of the wetting curve for hysteresis (cm), H\_ENPR is air entry pressure head (cm), and BDENS is dry soil bulk density ( $\text{mg}\cdot\text{cm}^{-3}$ ).

**Table S4.** Comparison of simulated and observed indicators in the SWAP-WOFOST model for peanut and soybean during the calibration period.

|                                                | $R^2$ | RMSE   | MAE    |
|------------------------------------------------|-------|--------|--------|
| Soybean LAI                                    | –     | 0.07   | 0.05   |
| Peanut LAI                                     | 0.999 | 0.13   | 0.107  |
| Soybean AGB ( $\text{kg}\cdot\text{ha}^{-1}$ ) | 0.977 | 539.52 | 429.19 |
| Peanut AGB ( $\text{kg}\cdot\text{ha}^{-1}$ )  | 0.973 | 750.17 | 547.56 |

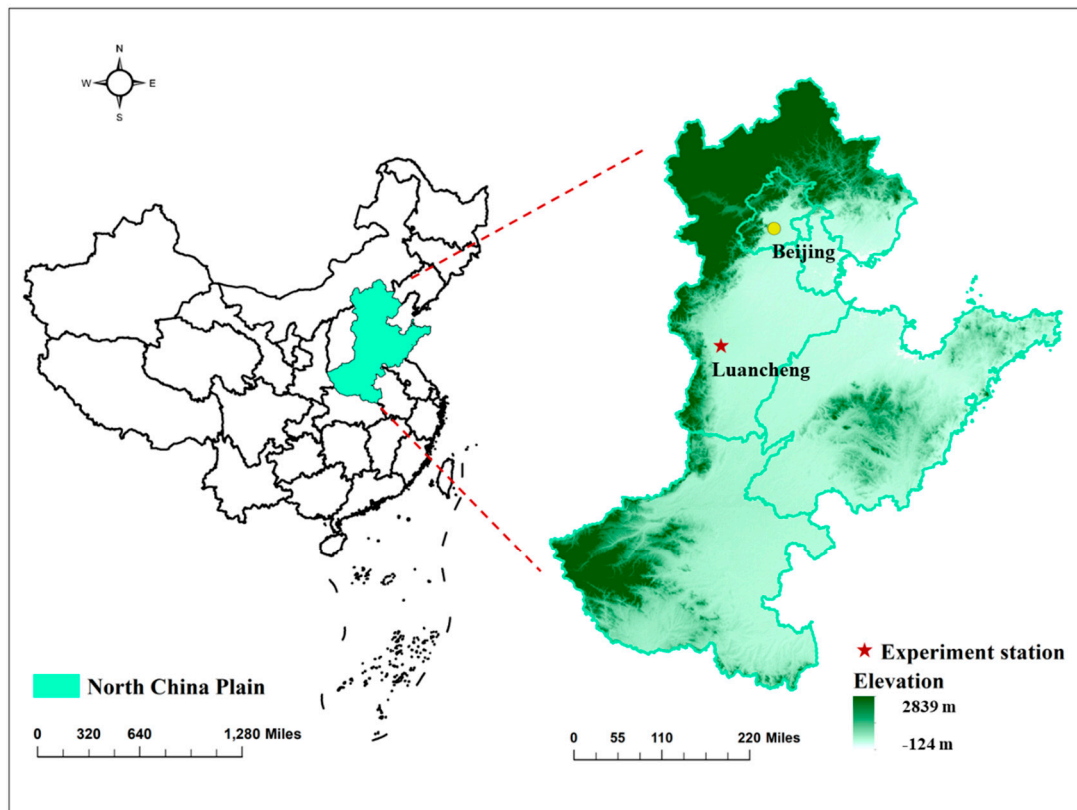

**Figure S1.** The location of study site.

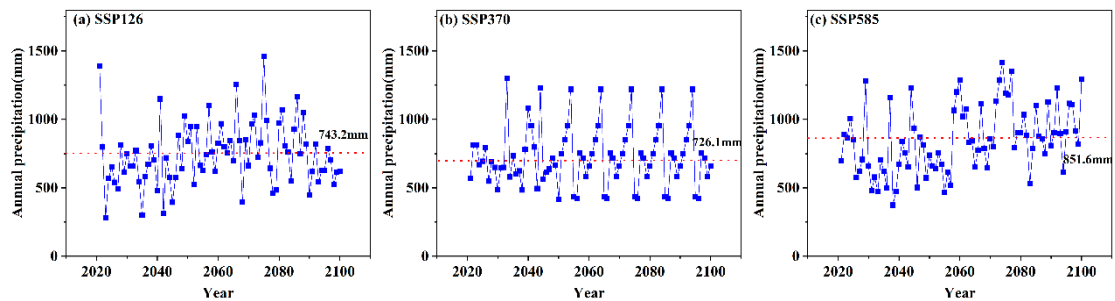

**Figure S2.** Annual precipitation distribution under three climate scenarios (2020–2100). The number value above the red dashed line was the average annual precipitation in three future climate scenarios.
